opioid-induced mechanical allodynia following chronic administration. *J Pharmacol Exp Ther* 2017; 362:254–62

54. Mi W, Wang S, You Z, Lim G, McCabe ME, Kim H, Chen L, Mao J: Nortriptyline enhances morphine-conditioned place preference in neuropathic rats: Role

of the central noradrenergic system. *Anesth Analg* 2017; 125:1032–41

55. Zhang Z, Tao W, Hou YY, Wang W, Kenny PJ, Pan ZZ: MeCP2 repression of G9a in regulation of pain and morphine reward. *J Neurosci* 2014; 34:9076–87

## ANESTHESIOLOGY REFLECTIONS FROM THE WOOD LIBRARY-MUSEUM

### Headlining the Musical Backdrop to Pauline Siegel's Caesarean Section “Under Local Anesthesia”

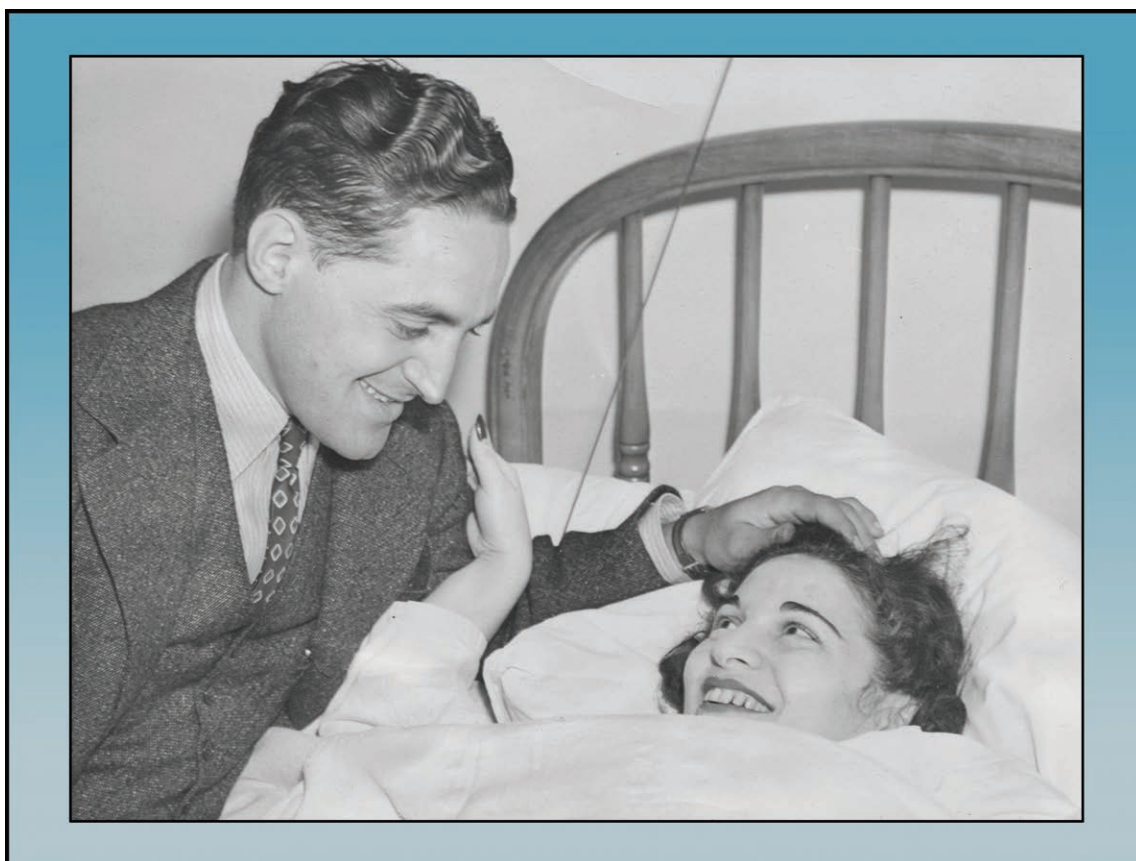

Allen and Pauline Siegel of Chicago, Illinois, seem elated in 1941 following the successful Caesarean-section delivery of their son by obstetrician Edward L. Cornell, as performed “under local anesthesia.” During the procedure, the 29-yr-old mother listened to soothing frequency-modulated (FM) radio music. Her obstetrician insisted on keeping the “pain-calmer” music “from distracting the operating staff.” Seventy-seven years ago, this story made newspaper headlines nationwide. (Copyright © the American Society of Anesthesiologists’ Wood Library-Museum of Anesthesiology.)

*George S. Bause, M.D., M.P.H., Honorary Curator and Laureate of the History of Anesthesia, Wood Library-Museum of Anesthesiology, Schaumburg, Illinois, and Clinical Associate Professor, Case Western Reserve University, Cleveland, Ohio. UJYC@aol.com.*
